# Supplementary material for: Identification and characterization of human testis derived circular RNAs and their existence in seminal plasma
Source: PubMed Central journal article supplement (PMC5153637; doi:10.1038/srep39080), 2016-12-13
Supplement: srep39080-s1.pdf [file srep39080-s1.pdf]

# Identification and characterization of human testis derived circular RNAs and their existence in seminal plasma

**Wei-Wei Dong<sup>1,+</sup>, Hui-Min Li<sup>1,+</sup>, Xing-Rong Qing<sup>1</sup>, Dong-Hui Huang<sup>1,2</sup>, Hong-Gang Li<sup>1,2,\*</sup>**

<sup>1</sup>Family Planning Research Institute/Center of Reproductive Medicine, Tongji Medical College, Huazhong University of Science and Technology, Wuhan, 430030, P. R. China

<sup>2</sup>Wuhan Tongji Reproductive Medicine Hospital, Wuhan, 430030, P. R. China

+These authors contribute equally to this work

\* Correspondence to: PhD. Hong-Gang Li, Family Planning Research Institute, Tongji Medical College, Huazhong University of Science and Technology, Hangkong Road 13, Wuhan 430030, P. R. China. Tel.: +86 27 83692651; Fax.: +86 27 83692651; E-mail: lhgyx@hotmail.com.

**Table S1. List of 30 validated testis derived circRNAs**

| Gene Symbol                    | circRNA ID       | Position                  | Strand | Genomic length (nt) | Spliced length (nt) | Exon Composition | Best transcript | Count |
|--------------------------------|------------------|---------------------------|--------|---------------------|---------------------|------------------|-----------------|-------|
| <i>SMARCA5</i>                 | hsa_circ_0001445 | chr4:144464662-144465125  | +      | 464                 | 269                 | 15-16            | NM_003601       | 662   |
| <i>CREBBP</i>                  | hsa_circ_0007637 | chr16:3900298-3901010     | -      | 713                 | 713                 | 2                | NM_004380       | 168   |
| <i>WDR26</i>                   | hsa_circ_0002322 | chr1:224605962-224612356  | -      | 6395                | 392                 | 4-6              | NM_025160       | 15    |
| <i>TBLIXR1</i>                 | hsa_circ_0068062 | chr3:176782708-176816329  | -      | 33622               | 179                 | 2-3              | NM_024665       | 7     |
| <i>SAE1</i>                    | hsa_circ_0007022 | chr19:47646751-47673180   | +      | 26430               | 635                 | 2-6              | NR_027280       | 22    |
| <i>ZFY</i>                     | hsa_circ_0001953 | chrY:2821950-2829687      | +      | 7738                | 662                 | 2-3              | NM_003411       | 30    |
| <i>CPSF6</i>                   | hsa_circ_0000417 | chr12:69644909-69656342   | +      | 11434               | 1599                | 2-9              | NM_007007       | 154   |
| <i>STAU2</i>                   | hsa_circ_0001811 | chr8:74585342-74601048    | -      | 15707               | 296                 | 3-4              | NM_014393       | 23    |
| <i>ADD3</i>                    | hsa_circ_0003357 | chr10:111883775-111890244 | +      | 6470                | 589                 | 10-13            | NM_016824       | 9     |
| <i>XRCC6</i>                   | has_circ_0063592 | chr22:4205907-42054356    | +      | 1450                | 231                 | 10-11            | NM_001469       | 78    |
| <i>LRWD1</i> <sup>+</sup>      | hsa_circ_0003327 | chr7:102106264-102106717  | +      | 454                 | 352                 | 2-3              | NM_152892       | 712   |
| <i>STK31</i> <sup>+</sup>      | hsa_circ_0133980 | chr13: 23775175-23776697  | +      | 1541                | 534                 | 7-8              | NM_001260504    | 1     |
| <i>HIST1H2BA</i> <sup>#+</sup> | None             | chr6:25727079-25727268    | +      | 190                 | 190                 | 1*               | NM_170610       | 12060 |
| <i>RNF17</i> <sup>+</sup>      | None             | chr13:25341410-25356082   | +      | 14673               | 481                 | 2-6              | NM_031277       | 13    |
| <i>BRDT</i> <sup>#+</sup>      | None             | chr1:92446446-92446735    | +      | 290                 | 290                 | 10               | NM_001242810    | 10    |
| <i>BRDT</i> <sup>#+</sup>      | None             | chr1:92428275-92433817    | +      | 5543                | 482                 | 3-5              | NM_001242805    | 8     |
| <i>STK31</i> <sup>+</sup>      | None             | chr13: 23792336-23794093  | +      | 1758                | 276                 | 9-10             | NM_001260504    | 38    |

|                             |                  |                           |   |       |      |       |              |     |
|-----------------------------|------------------|---------------------------|---|-------|------|-------|--------------|-----|
| <i>STK31</i> <sup>+</sup>   | None             | chr13:23751718-23776697   | + | 24980 | 967  | 2-8   | NM_001260504 | 28  |
| <i>SMC1B</i> <sup>#</sup>   | None             | chr22:45749858-45750995   | - | 1138  | 312  | 20-21 | NM_148674    | 3   |
| <i>SPATA16</i> <sup>+</sup> | None             | chr3:172694758-172766884  | - | 72127 | 321  | 3-5   | NM_031955    | 8   |
| <i>SAEI</i>                 | hsa_circ_0002444 | chr19:47646751-47658470   | + | 11720 | 529  | 2-5   | NR_027280    | 12  |
| <i>SAEI</i>                 | hsa_circ_0051660 | chr19:47653459-47658470   | + | 5012  | 417  | 3-5   | NR_027280    | 2   |
| <i>SAEI</i>                 | hsa_circ_0007219 | chr19:47653459-47656297   | + | 2839  | 317  | 3-4   | NR_027280    | 9   |
| <i>RNF17</i> <sup>+</sup>   | hsa_circ_0100094 | chr13:25348951-25356082   | + | 7132  | 386  | 3-6   | NM_031277    | 28  |
| <i>RNF17</i> <sup>+</sup>   | hsa_circ_0100095 | chr13:25352433-25356082   | + | 3650  | 294  | 4-6   | NM_031277    | 58  |
| <i>BRDT</i> <sup>#</sup>    | None             | chr1:92428275-92430321    | + | 2047  | 367  | 3-4   | NM_001242805 | 5   |
| <i>ADD3</i>                 | None             | chr10:111878345-111886261 | + | 7917  | 1041 | 6-12  | NM_016824    | 25  |
| <i>TEX14</i> <sup>+</sup>   | None             | chr17:56690782-56693666   | - | 2885  | 369  | 7-9   | NM_198393    | 35  |
| <i>ADAMTS13</i>             | hsa_circ_0089372 | chr9:136302869-136303486  | + | 618   | 270  | 13-14 | NM_139025    | 64  |
| <i>XRCC6</i>                | has_circ_0063591 | chr22:42046727-42046895   | + | 169   | 169  | 8     | NM_001469    | 120 |

\* ElciRNAs (exon-intron circRNAs): comprised of exons and introns. # These genes are first discovered by us to form circRNAs (not included in CircBase). <sup>+</sup>These genes are testis-specific.

**Table S2. Primers of 30 validated testis derived circRNAs for general and quantitative RT-PCR**

| Gene Symbol                   | circRNA ID or Position   | Exon Composition | Forward primer              | Reverse primer              | Length (nt) | AT(°C) |
|-------------------------------|--------------------------|------------------|-----------------------------|-----------------------------|-------------|--------|
| <i>SMARCA5</i>                | hsa_circ_0001445         | 15-16            | F:TCTAGACTGCAGAGATGAATGAAAA | R:ATCTTCATCAGTGATCTCACTTTCC | 241         | 62     |
| <i>CREBBP</i>                 | hsa_circ_0007637         | 2                | F:AGTCATGAATGGATCTCTTGGGG   | R:CATTGGGTATCAGCTCATCAGGA   | 235         | 58     |
| <i>WDR26</i>                  | hsa_circ_0002322         | 4-6              | F:CCCCACGGCGTTTACAGA        | R:TTGTATTTACAGCGGCGTCAA     | 240         | 58     |
| <i>TBLIXR1</i>                | hsa_circ_0068062         | 2-3              | F:CCTGTGTTGTGACCTCATGGT     | R:GCATTGATGTGGGGATGTGC      | 161         | 62     |
| <i>ZFY</i>                    | hsa_circ_0001953         | 2-3              | F:GTGCCCTGAAGCAGTCATAG      | R:GCATCAGCTCCTATTCCATCAAA   | 192         | 58     |
| <i>CPSF6</i>                  | hsa_circ_0000417         | 2-9              | F:TCCCGTAGTAGAGACCGTCA      | R:CTCGGTCTTCTGGGGCATC       | 220         | 58     |
| <i>STAU2</i>                  | hsa_circ_0001811         | 3-4              | F:TGGAAGTGAATGGGCTTGCT      | R:CTGCCTTCGGATTCCCATGT      | 171         | 58     |
| <i>ADD3</i>                   | hsa_circ_0003357         | 10-13            | F:CCACCAGCTCCTCCTAACC       | R:TTTTTCACGCTGTTGCCTCTG     | 259         | 62     |
| <i>XRCC6</i>                  | has_circ_0063592         | 10-11            | F:TGACAGCTTTGAGAACCCCG      | R:TAGCCTTCATCTTGCCCACC      | 200         | 62     |
| <i>LRWD1<sup>+</sup></i>      | hsa_circ_0003327         | 2-3              | F:ACGCTCCGTAAGGTCAATGG      | R:ACTGGCACAAGGCAGTAACA      | 269         | 58     |
| <i>STK31<sup>+</sup></i>      | hsa_circ_0133980         | 7-8              | F:AAGTAGAGCAGATTGCCCAGG     | R:AGGAATGGGGCTTTTGAGGT      | 269         | 62     |
| <i>HIST1H2BA<sup>#+</sup></i> | chr6:25727079-25727268   | 1*               | F:AAGGAAGGCAAAAAGCGCAA      | R:CTCCGGCATAGCTACCACAC      | 129         | 62     |
| <i>BRDT<sup>#+</sup></i>      | chr1:92446446-92446735   | 10               | F:GAGCCTTCTCTGAGCAATTCCA    | R:CGCCCAAGTTTATCTCCAGGG     | 265         | 62     |
| <i>BRDT<sup>#+</sup></i>      | chr1:92428275-92433817   | 3-5              | F:AGATGCCACAAGAAGAGCAAGT    | R:CATCCACAGGACGTTGAAAGG     | 260         | 62     |
| <i>STK31<sup>+</sup></i>      | chr13: 23792336-23794093 | 9-10             | F:AAGTGTTGGATGAAGGGTGCT     | R:TTCCGAAACGGACACTGATGT     | 255         | 62     |
| <i>STK31<sup>+</sup></i>      | chr13: 23751718-23776697 | 2-8              | F:CCATTCCTTTGTGGGGGCATA     | R:TGACTTCCAACCACATCTTCCA    | 371         | 62     |
| <i>SMC1B<sup>#+</sup></i>     | chr22:45749858-45750995  | 20-21            | F:TTCACCCAGTGTTTTGAGCAT     | R:GGGGCTGCTGTTTTTCAGTAAG    | 173         | 58     |
| <i>SPATA16<sup>+</sup></i>    | chr3:172694758-172766884 | 3-5              | F:GAGTGCCATGATTGCTGACT      | R:GCAAGATCTGGTTTCCTCATCC    | 213         | 58     |

|                           |                           |       |                                                  |     |    |
|---------------------------|---------------------------|-------|--------------------------------------------------|-----|----|
| <i>ADD3</i>               | chr10:111878345-111886261 | 6-12  | F:ACACAAACCCGAATGAGGTACTA R:GATTGCAGCATGGGGACTGA | 215 | 62 |
| <i>TEX14</i> <sup>†</sup> | chr17:56690782-56693666   | 7-9   | F:GAAAACCCGCCTTGTGTACG R:CCTGCTCCCATTCCACACTA    | 217 | 62 |
| <i>ADAMTS13</i>           | hsa_circ_0089372          | 13-14 | F:ATGGACTCCCAGCAGGTATGG R:TTGGCATAACCCGGGTCC     | 196 | 58 |
| <i>XRCC6</i>              | has_circ_0063591          | 8     | F:TGGGTTTCAAGCCGTTGGTA R:TCAAACCTGGATCATCAAACCG  | 163 | 58 |
| <i>BRDT</i> <sup>†</sup>  | chr1:92428275-92430321    | 3-4   | F:CAACGTCCTGTGGATGCTGTG R:TCGACTTGGCAGAGACATTCTT | 229 | 62 |

The primers for circRNAs derived from *RNF17* and *SAEI* are shown in Table S3 and Table S4 respectively. \* EICI RNAs (exon-intron circRNAs): comprised of exons and introns.

# These genes are first discovered by us to form circRNAs (not included in circBase). <sup>†</sup> These genes are testis-specific.

**Table S3. Primers for alternative circularized circRNA products of *RNF17***

| Primers   | Primer sequences(5'-3')                                 | Forward<br>Primer | Reverse<br>Primer | Aim products                               | Length<br>(nt) | AT(°C) |
|-----------|---------------------------------------------------------|-------------------|-------------------|--------------------------------------------|----------------|--------|
| Primers-1 | F: ACTTGAACACATGCAGAAGCA<br>R: CAGGGCATATAATTGTGGTGCATT | Exon 6            | Exon 2            | ①<br>circRNF17:chr13:25341410-25<br>356082 | 186            | 62     |
|           |                                                         |                   |                   | ②hsa_circ_0100094                          | 132            |        |
| Primers-2 | F: TGCAGAAGCAAACGATAGAGGA<br>R: GCCATTGGGTAGTAGCGTTG    | Exon 6            | Exon 3            | ①<br>circRNF17:chr13:25341410-25<br>356082 | 227            | 58     |
|           |                                                         |                   |                   | ②hsa_circ_0100094                          | 132            |        |
| Primers-3 | F: CACTTGAACACATGCAGAAGCA<br>R: GTCTTGCTGTGGAGGCTGAA    | Exon 6            | Exon 4            | ①<br>circRNF17:chr13:25341410-25<br>356082 | 371            |        |
|           |                                                         |                   |                   | ②hsa_circ_0100094                          | 276            | 58     |
|           |                                                         |                   |                   | ③hsa_circ_0100095                          | 184            |        |

**Table S4. Primers for alternative circularized circRNA products of *SAE1***

| <b>Primers</b> | <b>Primer sequences(5'-3')</b>                        | <b>Forward Primer</b> | <b>Reverse Primer</b> | <b>Aim products</b> | <b>Length (nt)</b> |
|----------------|-------------------------------------------------------|-----------------------|-----------------------|---------------------|--------------------|
| Primers-1      | F:TCTGCCCTGTAAAGAAGCCC<br>R: GATCCAGCATGGTCAGTCCT     | Exon 6                | Exon 2                | ① hsa_circ_0007022  | 200                |
|                |                                                       |                       |                       | ② hsa_circ_0002444  | 175                |
| Primers-2      | F: TGCCAAAGTTAGCCAAGGAGTA<br>R: AGTCCTTTCACCTGCCAAG   | Exon 5                | Exon 2                | ① hsa_circ_0007022  | 281                |
|                |                                                       |                       |                       | ② hsa_circ_0002444  | 175                |
| Primers-3      | F: GCCAAAGTTAGCCAAGGAGTAG<br>R: TCAGTGTCCACCTTCACATCC | Exon 5                | Exon 3                | ① hsa_circ_0007022  | 430                |
|                |                                                       |                       |                       | ② hsa_circ_0002444  | 324                |
|                |                                                       |                       |                       | ③ hsa_circ_0051660  | 212                |
| Primers-4      | F: CTGCTCCAGGGATGTCATAGTT<br>R: TTCGGCCAACAGACCCAGTA  | Exon 4                | Exon 3                | ① hsa_circ_0007022  | 505                |
|                |                                                       |                       |                       | ② hsa_circ_0002444  | 399                |
|                |                                                       |                       |                       | ③ hsa_circ_0051660  | 287                |
|                |                                                       |                       |                       | ④ hsa_circ_0007219  | 187                |

**Table S5. Primers of 10 circRNAs and mRNAs for absolute qPCR**

| Gene Symbol                    | Forward primer             | Reverse primer             | Length (nt) | AT (°C) |
|--------------------------------|----------------------------|----------------------------|-------------|---------|
| <i>circADD3</i>                | F:CCACCAGCTCCTCCTAACC      | R:TTTTTCACGCTGTTGCCTCTG    | 259         | 62      |
| <i>mADD3</i>                   | F:TCAGTTGCTTGCTGGAATTG     | R:ATGGGTTAGGAGGAGCTGGT     | 111         | 60      |
| <i>circCPSF6</i>               | F:TCCCGTAGTAGAGACCGTCA     | R:CTCGGTCTTCTGGGGCATC      | 220         | 58      |
| <i>mCPSF6</i>                  | F:CTTCTTTTCTCCACCAAC       | R:GCAGTATCCATTTCCCTTC      | 136         | 60      |
| <i>circCREBBP</i>              | F:AGTCATGAATGGATCTCTTGGGG  | R:CATTGGGTATCAGCTCATCAGGA  | 235         | 58      |
| <i>mCREBBP</i>                 | F:AGACCCTAACGCAGGTTTCC     | R:GGAAGGTGGGCAAACCTGTTG    | 210         | 58      |
| <i>circHIST1H2BA</i>           | F:AAGGAAGGCAAAAAGCGCAA     | R:CTCCGGCATAGCTACCACAC     | 129         | 62      |
| <i>mHIST1H2BA</i>              | F:GCAAAAAGCGCAAGAGGACC     | R:CGCTCGCTATAACGCTCAAAG    | 150         | 62      |
| <i>circLRWD1</i>               | F:ACGCTCCGTAAGGTCAATGG     | R:ACTGGCACAAGGCAGTAACA     | 269         | 58      |
| <i>mLRWD1</i>                  | F:GTGCCCAACCAGGACTAC       | R:ATTCCACTTCACACACCCT      | 190         | 60      |
| <i>circRNF17</i>               | F:ACTTGAACACATGCAGAAGCA    | R:CAGGGCATATAATTGTGGTGCATT | 186         | 62      |
| <i>mRNF17</i>                  | F:ACACATGCAGAAGCAAACGA     | R:GGCGATAATTGTAATGCTCTTGCT | 234         | 62      |
| <i>circSPATA16<sup>+</sup></i> | F:GAGTGCCATGATTGCTGACT     | R:GCAAGATCTGGTTTCCTCATCC   | 213         | 58      |
| <i>mSPATA16</i>                | F:CACCCACCTAACATCCTG       | R:TTTCTTCACCTTCTGCCTT      | 166         | 60      |
| <i>circSTAU2</i>               | F:TGGAACTGAATGGGCTTGCT     | R:CTGCCTTCGGATTCCCATGT     | 171         | 58      |
| <i>mSTAU2</i>                  | F:CAACTGTGGAAGTGAATGG      | R:ACTGGGCAATGATACCTCT      | 139         | 60      |
| <i>circSTK31</i>               | F:AAGTAGAGCAGATTGCCCAGG    | R:AGGAATGGGGCTTTTGAGGT     | 269         | 62      |
| <i>mSTK31</i>                  | F:GGTCTAACGTCAGCCTGGAA     | R:TCAGTATTTCCATCTTAGCTGCCA | 249         | 62      |
| <i>circTBLIXR1</i>             | F:CCTGTGTTGTGACCTCATGGT    | R:GCATTGATGTGGGGATGTGC     | 161         | 62      |
| <i>mTBLIXR1</i>                | F:AGCAGTGATGAGGTCAACTTCTTG | R:GATGATAGAAATCAATGCAGCGGG | 150         | 62      |



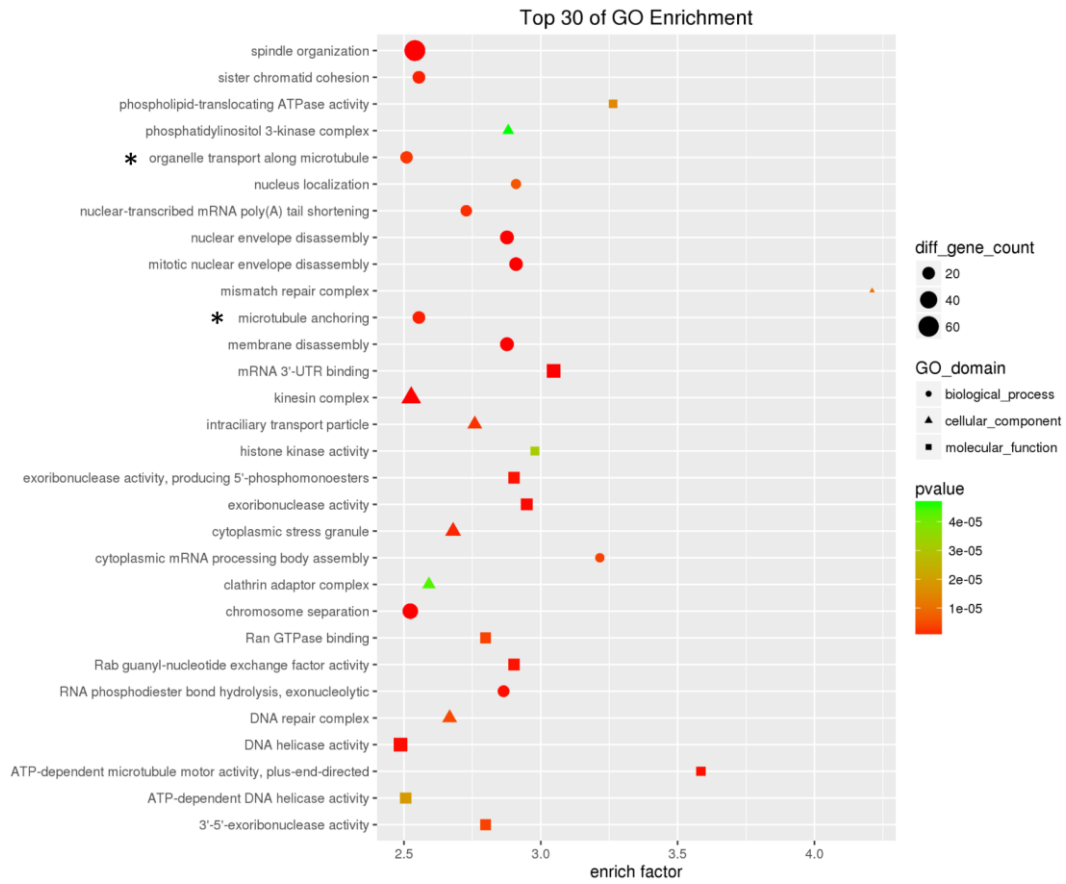

**Figure S1. GO annotation of 4911 host genes (5928-1017) in human testis. Top 30 of GO enrichment are shown here. \* GO domains directly related with reproduction.**

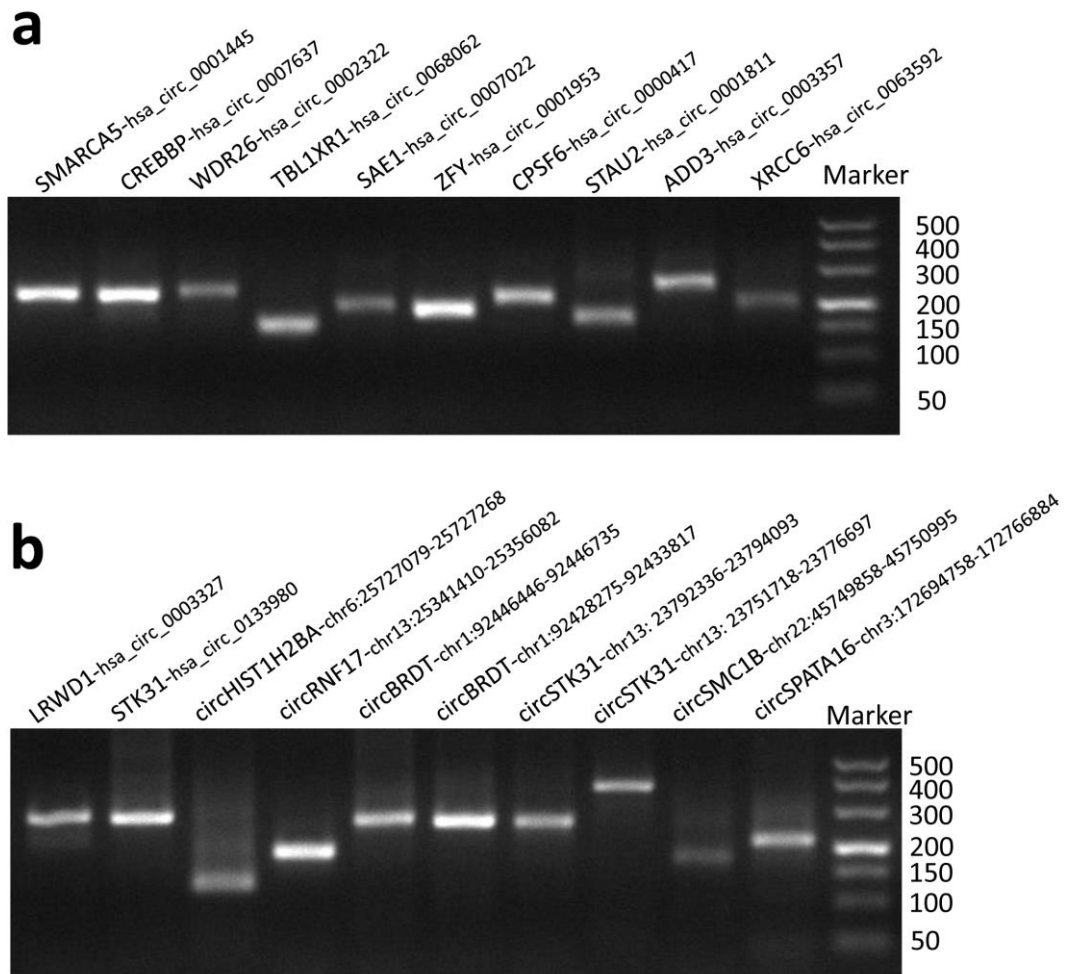

**Figure S2. Twenty validated circRNAs in human testis.** (a) circRNAs derived from commonly expressed host genes. (b) circRNAs from testis specific expressed genes.

**a**

SMARCA5-hsa\_circ\_0001445

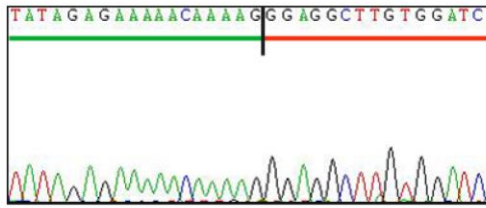

CREBBP-hsa\_circ\_0007637

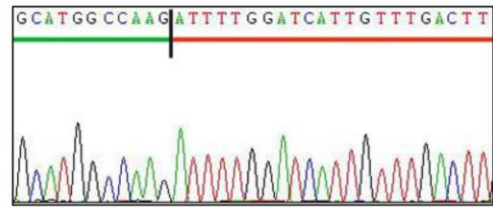

WDR26-hsa\_circ\_0002322

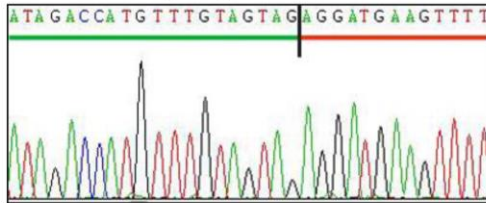

TBL1XR1-hsa\_circ\_0068062

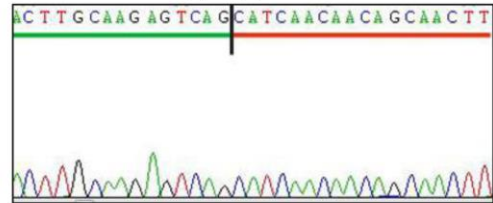

SAE1-hsa\_circ\_0007022

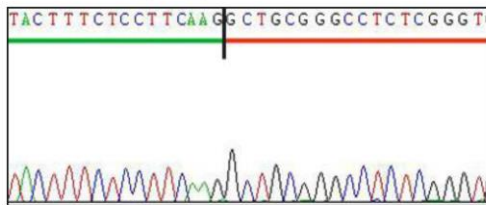

ZFY-hsa\_circ\_0001953

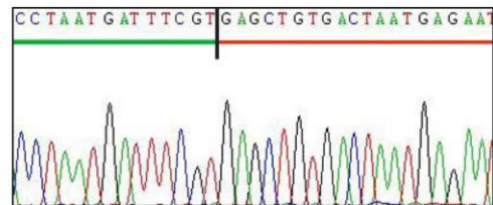

CPSF6-hsa\_circ\_0000417

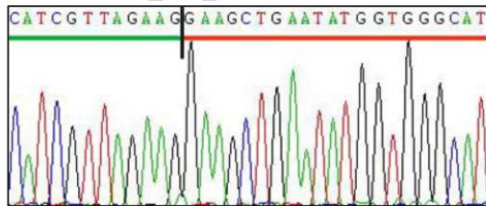

STAU2-hsa\_circ\_0001811

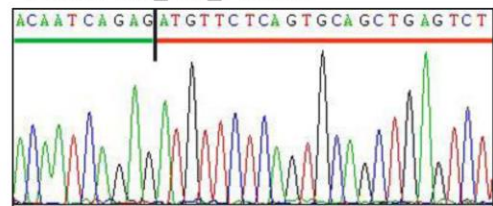

ADD3-hsa\_circ\_0003357

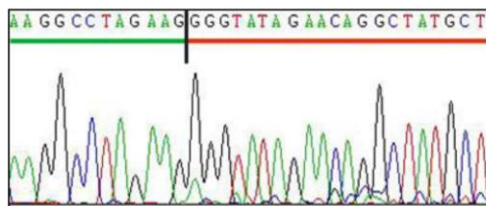

XRCC6-hsa\_circ\_0063592

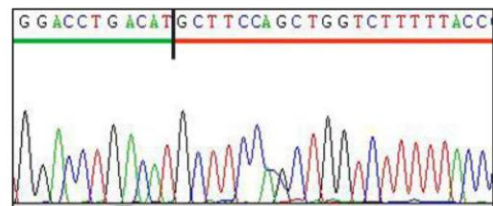

**b**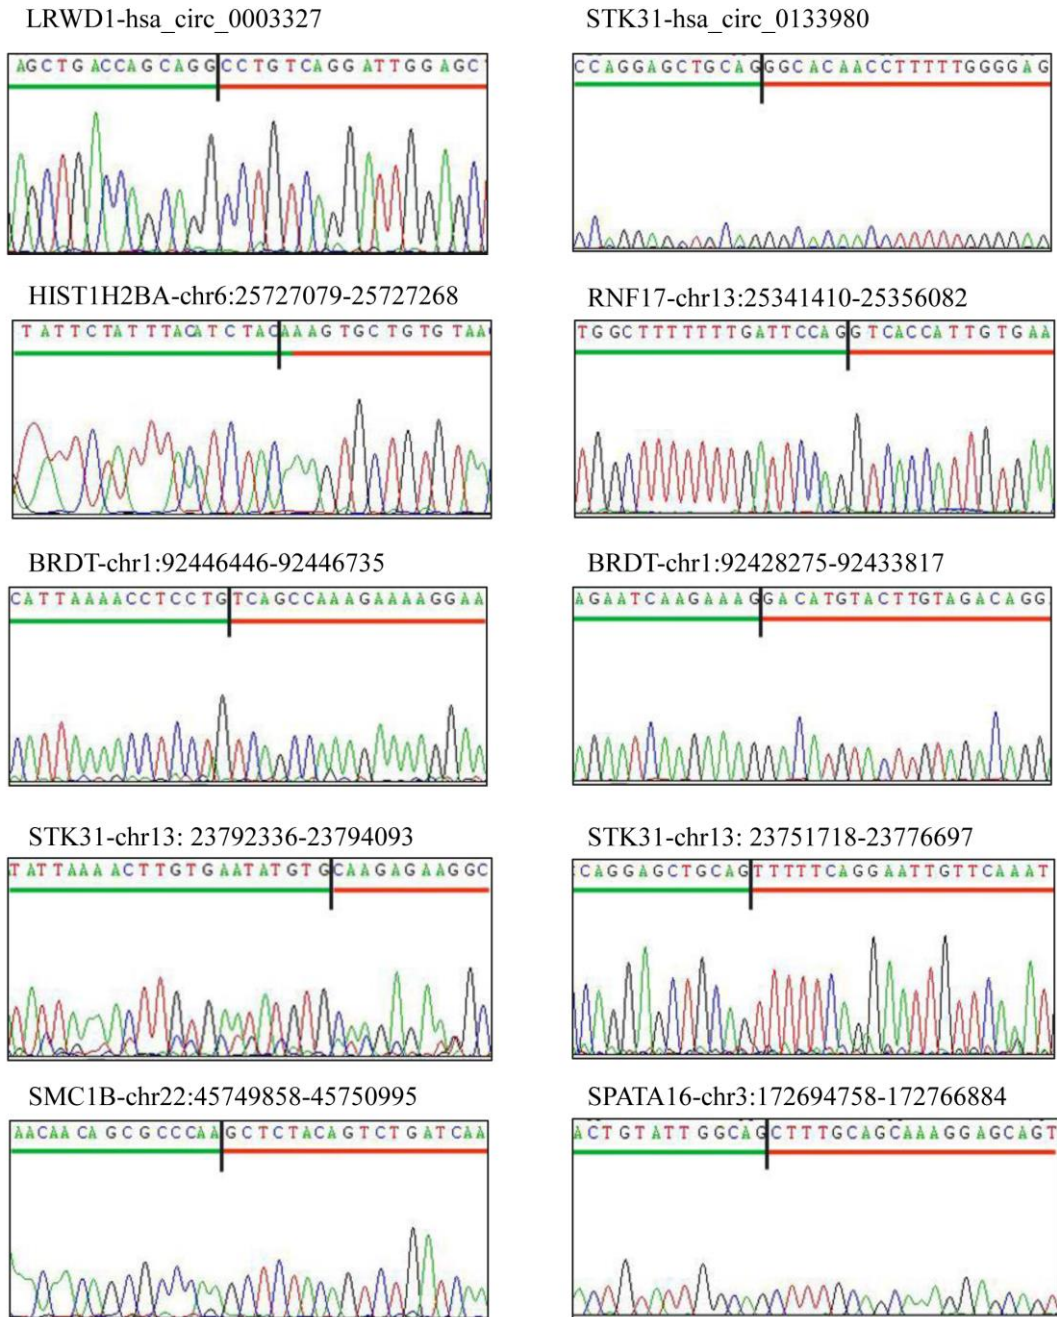

**Figure S3. Sanger sequencing map for 20 of the 30 validated circRNAs.** (a) circRNAs derived from commonly expressed host genes. (b) circRNAs from testis specific expressed genes. Black vertical line: splicing junction; green horizontal line: the 3' end of the splice donor; red horizontal line: the 5' end of the splice receptor.

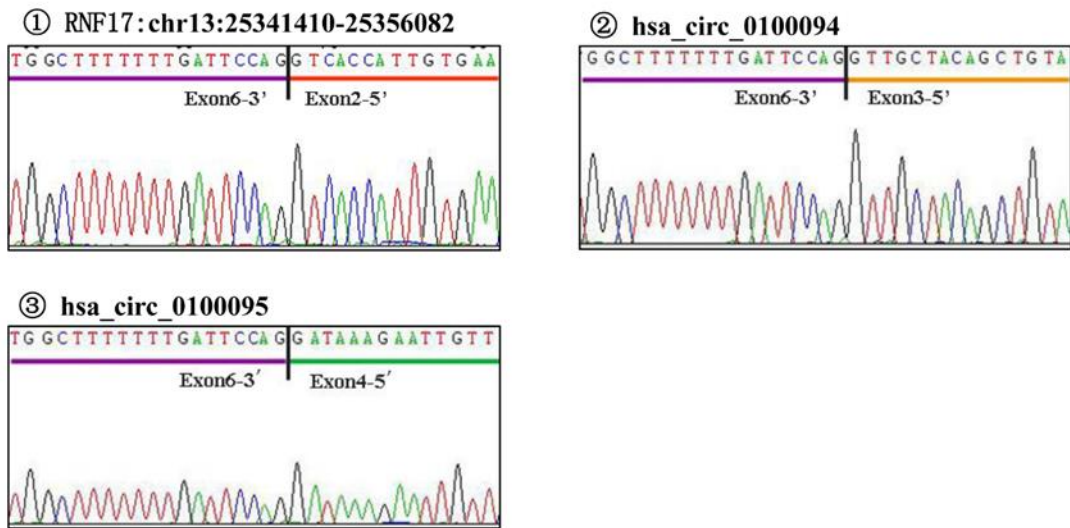

**Figure S4. Sanger sequencing map for three alternative splicing products of *RNF17*.**

Black vertical line: splicing junction; green horizontal line: the 3' end of the splice donor; red horizontal line: the 5' end of the splicing receptor.

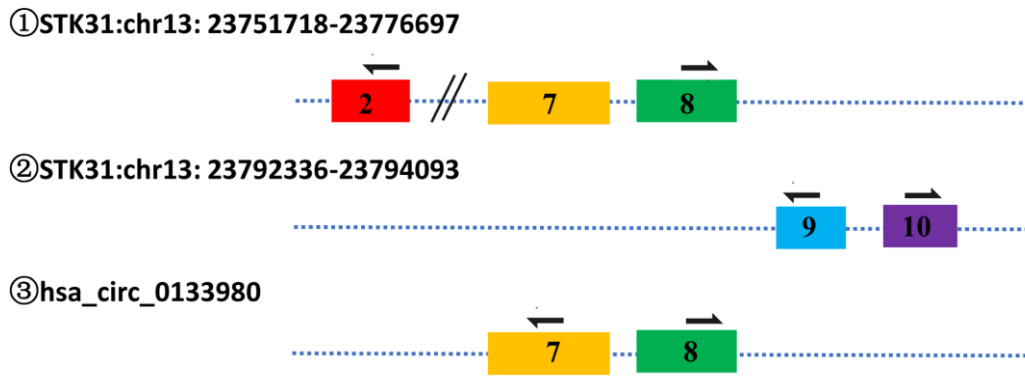

**Figure S5. Alternative splicing of *STK31* generated different circRNAs.** The coloured blocks represent different exons of *STK31*. Arrows show the primer location set as different exons.

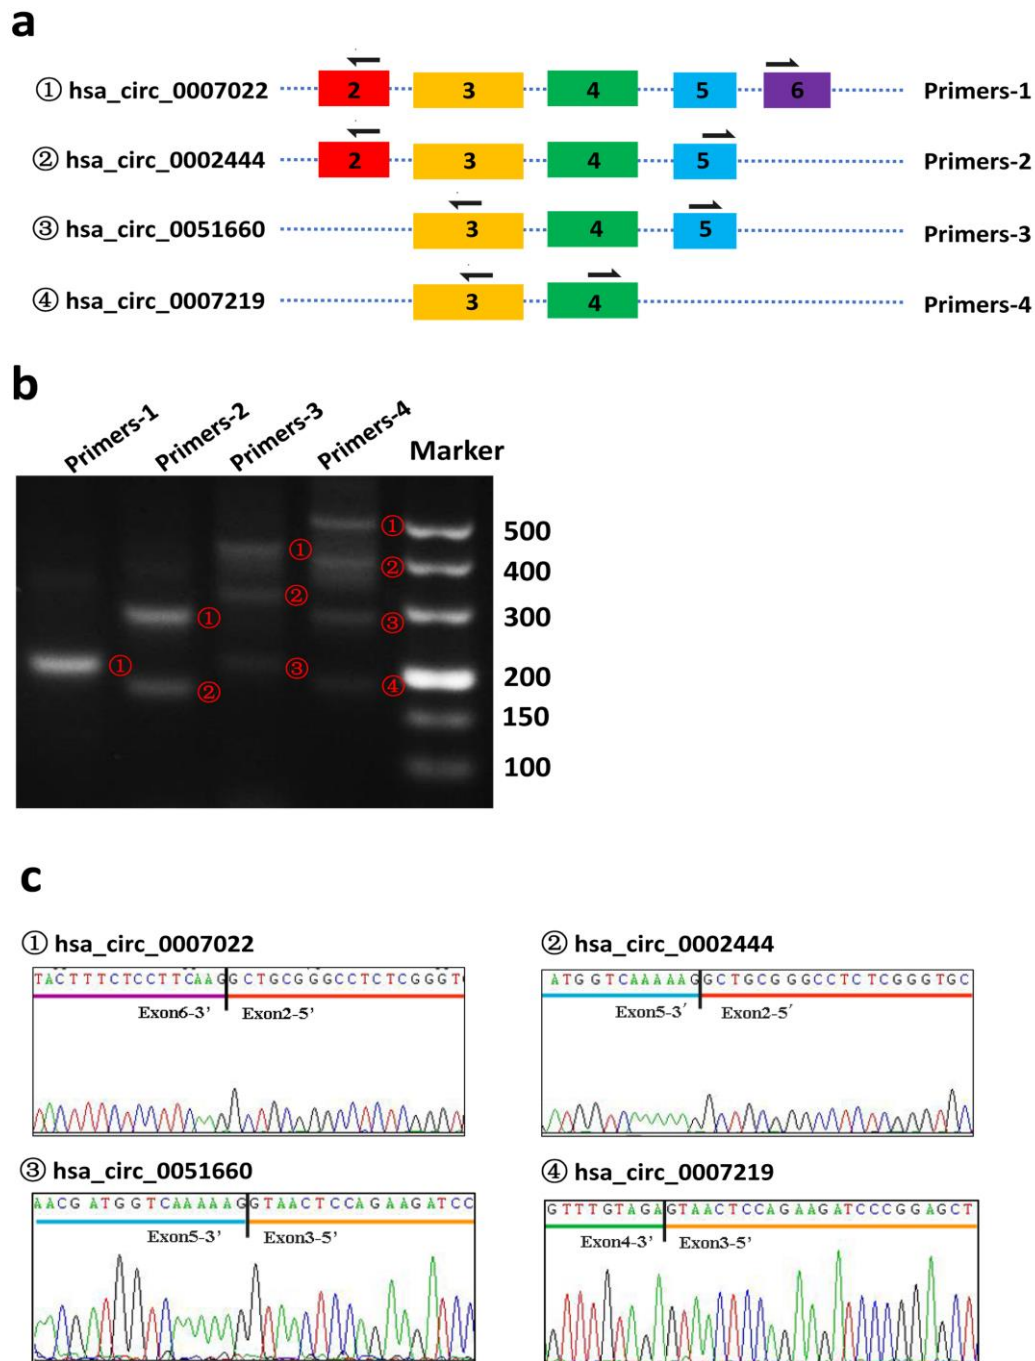

**Figure S6. Alternative splicing of *SAE1* formed four kinds of circRNAs.** (a) Mode pattern of different circularizing ways of *SAE1*. The coloured blocks represent different exons of *SAE1*. Arrows show the primer location set as different exons. (b) RT-PCR validation for three kinds of circRNAs derived from *SAE1* using different primers. (c) Sanger sequencing map for the three alternative splicing circular products of *SAE1*.

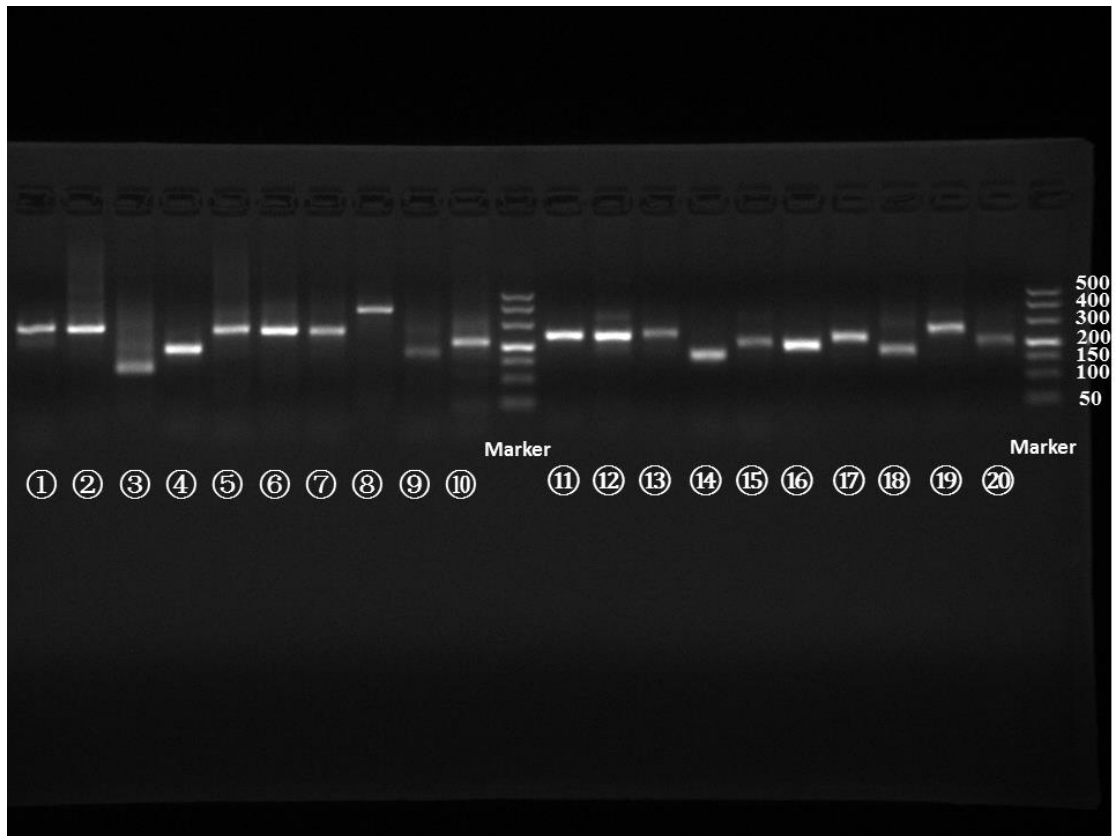

Figure S7. Twenty validated circRNAs in human testis (full-length gels and blots of Fig. S2).

- ① LRWD1-hsa\_circ\_0003327; ② STK31-hsa\_circ\_0133980;
- ③ circHIST1H2BA-chr6:25727079-25727268; ④ circRNF17-chr13:25341410-25356082;
- ⑤ circBRDT-chr1:92446446-92446735; ⑥ circBRDT-chr1:92428275-92433817;
- ⑦ circSTK31-chr13: 23792336-23794093; ⑧ circSTK31-chr13: 23751718-23776697;
- ⑨ circSMC1B-chr22:45749858-45750995; ⑩ circSPATA16-chr3:172694758-172766884;
- ⑪ SMARCA5-hsa\_circ\_0001445; ⑫ CREBBP-hsa\_circ\_0007637;
- ⑬ WDR26-hsa\_circ\_0002322; ⑭ TBL1XR1-hsa\_circ\_0068062;
- ⑮ SAE1-hsa\_circ\_0007022; ⑯ ZFY-hsa\_circ\_0001953;
- ⑰ CPSF6-hsa\_circ\_0000417; ⑱ STAU2-hsa\_circ\_0001811;
- ⑲ ADD3-hsa\_circ\_0003357; ⑳ XRCC6-hsa\_circ\_0063592



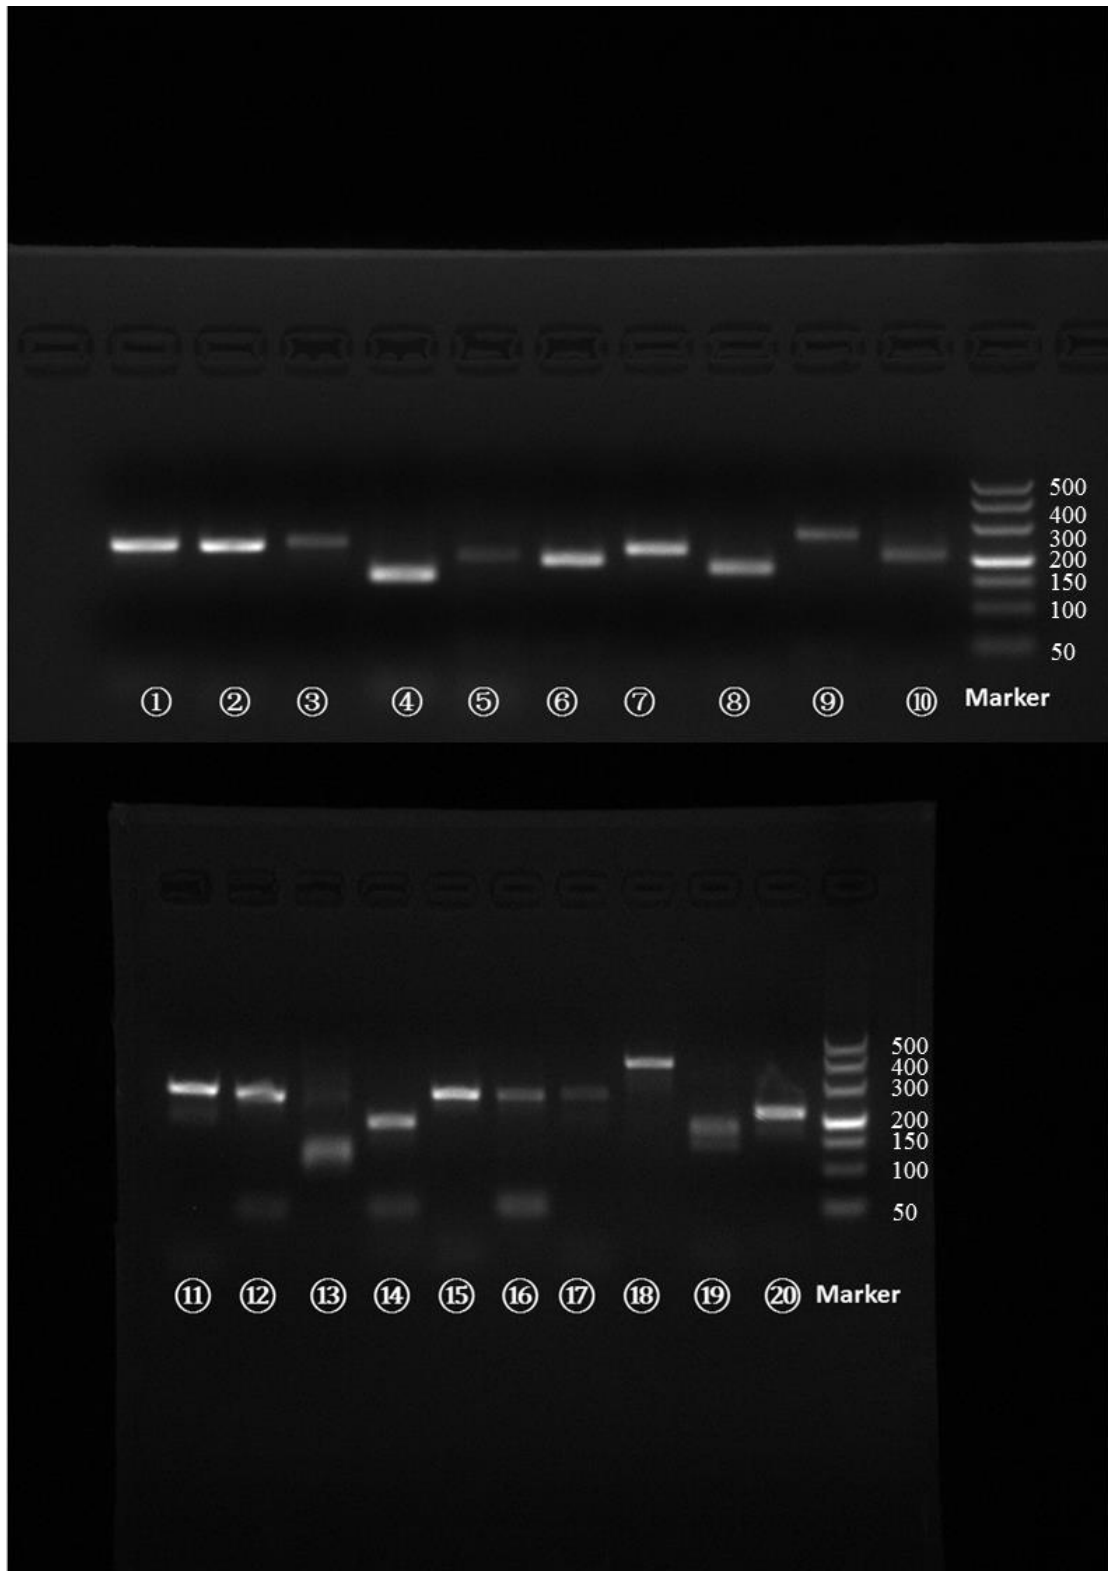

Figure S8. Testis-derived cell-free seminal circRNAs (cfs-circRNAs) (full-length gels and blots of Fig. 4a, 4b).

- ① SMARCA5-hsa\_circ\_0001445; ② CREBBP-hsa\_circ\_0007637;  
 ③ WDR26-hsa\_circ\_0002322; ④ TBL1XR1-hsa\_circ\_0068062;

- ⑤ SAE1-hsa\_circ\_0007022; ⑥ ZFY-hsa\_circ\_0001953;
- ⑦ CPSF6-hsa\_circ\_0000417; ⑧ STAU2-hsa\_circ\_0001811;
- ⑨ ADD3-hsa\_circ\_0003357; ⑩ ADD3-hsa\_circ\_0003357;
- ⑪ LRWD1-hsa\_circ\_0003327; ⑫ STK31-hsa\_circ\_0133980;
- ⑬ circHIST1H2BA-chr6:25727079-25727268; ⑭ circRNF17-chr13:25341410-25356082
- ⑮ circBRDT-chr1:92446446-92446735; ⑯ circBRDT-chr1:92428275-92433817
- ⑰ circSTK31-chr13: 23792336-23794093; ⑱ circSTK31-chr13: 23751718-23776697;
- ⑲ circSMC1B-chr22:45749858-45750995; ⑳ circSPATA16-chr3:172694758-172766884.

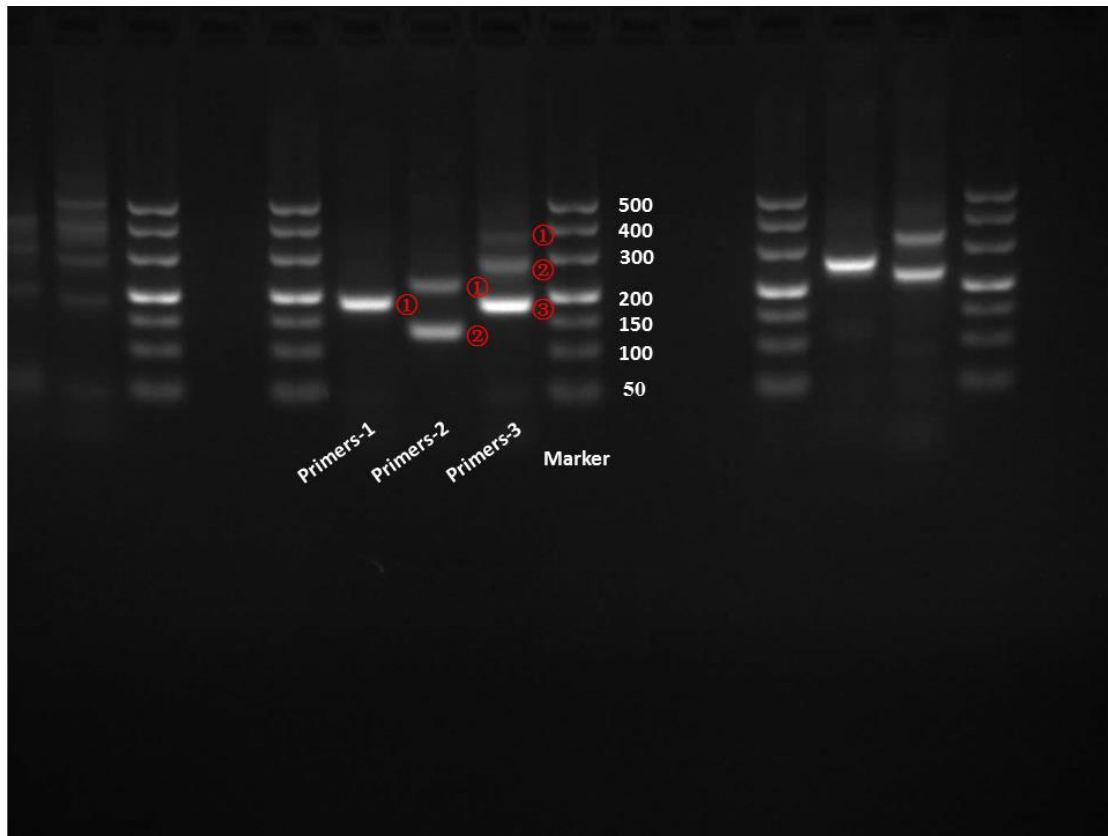

Figure S9. Electrophoretogram for three kinds of circRNAs derived from RNF17 using different primers in RT-PCR (full-length gels and blots of Fig. 3d)

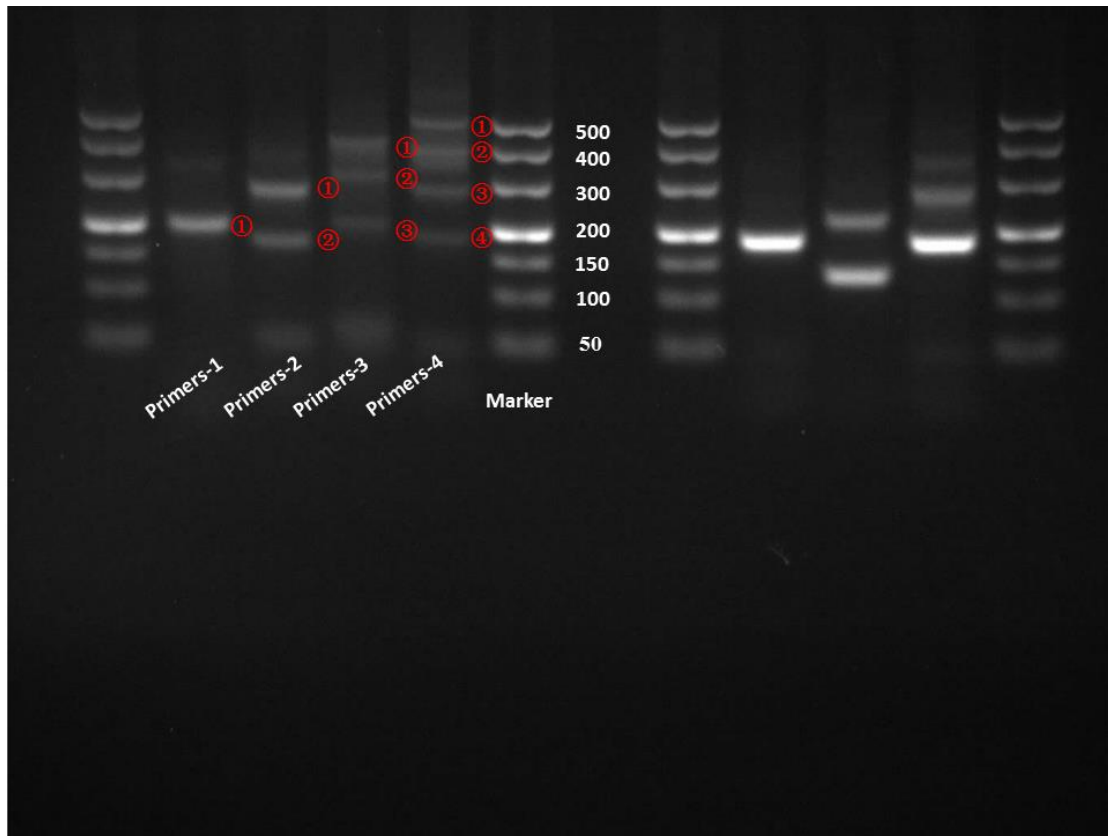

Figure S10. Alternative splicing of SAE1 formed four kinds of circRNAs (full-length gels and blots of Fig. S6b)
